# Supplementary material for: A 3-D coordination network constructed from an angular bis-oxamato tecton and calcium ions
Source: Royal Society of Chemistry journal article supplement (doi:10.1039/c3ce41376d), 2013-01-01
Supplement: c3ce41376d.pdf [file c3ce41376d.pdf]

## Supporting Information

### **A 3-D coordination network constructed from an angular bis-oxamato tecton and calcium ions**

**Rafael A. Allão Cassaro<sup>a</sup>, Jackson A. L. C. Resende<sup>a</sup>, Sauli Santos Jr.<sup>b</sup>, Lorenzo Sorace<sup>c</sup>,  
Marius Andruh<sup>a,d</sup>, Maria G. F. Vaz<sup>a\*</sup>**

<sup>a</sup> *Instituto de Química, Universidade Federal Fluminense, Outeiro de S. João Batista s/n, Niterói,  
24020-150, RJ, Brazil.*

<sup>b</sup> *Curso de Física, Universidade Federal de Goiás, Jataí, 75804-120, GO, Brazil.*

<sup>c</sup> *Dipartimento di Chimica "U. Schiff" and UdR INSTM, Università degli Studi di Firenze, Via della  
Lastruccia 3, 50019 Sesto Fiorentino, Italy.*

<sup>d</sup> *Inorganic Chemistry Laboratory, Faculty of Chemistry, University of Bucharest, Str. Dumbrova  
Rosie nr. 23, 020464, Bucharest, Romania.*

## 1- Experimental

All reagents were purchased from Aldrich and Tedia. Infrared (IR) spectra were recorded with Bruker ALPHA spectrophotometer. Gel crystallization was performed using gelatin from bovine skin Type B (Aldrich). Elemental Analysis was performed with a Flash E1112 Thermofinnigan. The metal percentage in the gelatin was determined using ICP/AES Spectro circus CCD by the Analysis service of the Universidade de São Paulo.

### *Synthesis*

The compound  $\text{H}_2\text{Et}_2\text{L}_2$  was synthesized according with the procedure described in the literature.<sup>1</sup> Single crystals were obtained when the hot solution of this compound in ethyl acetate was slowly cooled to room temperature.

### **H<sub>4</sub>L**

To an aqueous solution of sodium hydroxide 0.1 M (70 mL) was added (0.75 g, 1.7 mmol) of  $\text{H}_2\text{Et}_2\text{L}$  under vigorous stirring. After the complete dissolution, HCl (1 M) was added and a white precipitate formed which was filtered under reduced pressure and washed with distilled water. This compound was recrystallized in 2-propanol. The solid was filtered out and single crystals were formed by slow evaporation of the solvent at room temperature. (0.34 g, 46%). IR ( $\text{cm}^{-1}$ ) = 3563(w), 3499 (w), 3405(w), 3306(m), 3100(w), 3065(w) 2903(w), 2815(w), 2650(w), 2525(w), 1793(m), 1604(vs), 1589(s), 1583(s), 1494(w), 1433(w), 1402(w) 1292(s), 1272(s), 1249(m), 1178(s), 1147(vs), 1120(m), 1106(s), 980(m,br), 926(m), 855(m), 844(s), 831(s), 820(m), 751(m), 714(s), 685(vs), 668(s), 628(m), 582(vs), 542(s), 529(s), 503(vs), 472(s), 434(w), 388(s). (0.34 g, 46%);  $^1\text{H-NMR}$ : (300 MHz, DMSO, ppm)  $\delta$  = 7.95(m, 8H), 11.06(s, 2H).  $^{13}\text{C-NMR}$  (DMSO, ppm): 120.55, 125.36, 136.39, 142.17, 157.39, 161.55; m. p. = (199-201) $^\circ\text{C}$ ; Elemental analysis calculated for  $\text{C}_{16}\text{H}_{16}\text{N}_2\text{O}_{10}\text{S}$  ( $\text{H}_4\text{L}\cdot 2\text{H}_2\text{O}$ ): C =44.86, H = 3.76, N = 6.54, found: C = 44.64, H = 3.84, N = 6.47.

## **[Ca(H<sub>2</sub>L)(H<sub>2</sub>O)].2H<sub>2</sub>O**

At first, we tried to synthesize this compound by adding an aqueous solution of CaCl<sub>2</sub> to an alkali solution of H<sub>4</sub>L and a precipitate was formed immediately when the solution was diluted or not. In order to obtain single crystals suitable for X-ray diffraction studies, crystallization using gel was performed. Two different kinds of gel were tested: gelatin and agarose with the best result obtained with gelatin. Since gelatin is a biological material, it is expected to have some metal ions in its constitution, therefore the elemental analysis of the K(I), Na(I) and Ca(II) was carried out using ICP/AES in order to quantify the amount of these ions in the gelatin. The concentration of these ions were 9.88, 2724.61 and 744.07 ppm for K(I), Na(I) and Ca(II), respectively. The crystallization using calcium chloride dissolved in the gelatin medium did not result in good quality crystals. However, it is known that some heterogeneous additives have improved the crystal quality even if they do not participate effectively in the reaction.<sup>2</sup> In order to evaluate the influence of transition metal ions in the crystallization of the [Ca(H<sub>2</sub>L)(H<sub>2</sub>O)].2H<sub>2</sub>O compound, FeSO<sub>4</sub>·7H<sub>2</sub>O, Mn(CH<sub>3</sub>COOH)<sub>2</sub>·4H<sub>2</sub>O and Zn(CH<sub>3</sub>COOH)<sub>2</sub>·2H<sub>2</sub>O were added to the gel solution. White single crystals were formed into the gel in all cases with the same crystalline structure, however, bigger crystals and better yield were obtained when iron(II) sulfate was used.

The gelatin (11.00 g) was dissolved in 880 mL of hot milli-Q water followed by the addition of 0.70 g of Fe(SO<sub>4</sub>)<sub>2</sub>·7H<sub>2</sub>O. The solution was transferred to test tubes and kept at 5°C for 24 hours. Then, 0.45 g (1.1 × 10<sup>-3</sup> mols) of H<sub>4</sub>L dissolved in 225 mL of 0.1 M potassium hydroxide solution was layered on the gel and kept at 5°C for two weeks. White single crystal formed into the gel were manually separated from the yellow precipitate formed on the bottom of the test tube.

### *Crystallographic studies*

Single crystal X-ray diffraction data were collected on an Oxford Xcalibur 3 for H<sub>4</sub>L and on a Xcalibur 3 Atlas Gemini Ultra diffractometers for [Ca(H<sub>2</sub>L)(H<sub>2</sub>O)].2H<sub>2</sub>O using graphite-monochromated MoK<sub>α</sub> radiation (λ = 0.71073 Å) and CuK<sub>α</sub> radiation (λ = 1.54184 Å), respectively. The unit cell parameters were determined using all the collected reflections; the absorption correction and the integration of the collected reflections were performed using the CRYCALISPRO software.<sup>3</sup> Empirical multi-scan absorption corrections using equivalent reflections were performed with the SCALE3 ABSPACK program.<sup>4</sup> Single crystal X-ray diffraction data were collected on a Nonius Kappa-CCD diffractometer for H<sub>2</sub>Et<sub>2</sub>L using graphite-monochromated MoK<sub>α</sub> radiation (λ = 0.71073 Å). Data integration and scaling of the

reflections were performed with the HKL Denzo and Scalepack.<sup>5</sup> The structures were solved by direct methods using the SHELXS program and the atomic coordinates, isotropic and anisotropic displacement parameters of all the non-hydrogen atoms were refined by means of a full matrix least-squares procedure on  $F^2$  using the SHELXL program.<sup>6</sup> Hydrogen atoms were placed in calculated positions and refined isotropically using a riding model, except for those atoms on water molecules which could be found in the difference Fourier map. The sulfonyl group and oxygen atoms of water molecules in the  $[\text{Ca}(\text{H}_2\text{L})(\text{H}_2\text{O})]\cdot 2\text{H}_2\text{O}$  structure are disordered over two positions and were refined with partial occupancy. Selected bond lengths and angles for  $[\text{Ca}(\text{H}_2\text{L})(\text{H}_2\text{O})]\cdot 2\text{H}_2\text{O}$  are given in table S3.

2- Chart of  $\text{H}_2\text{Et}_2\text{L}$

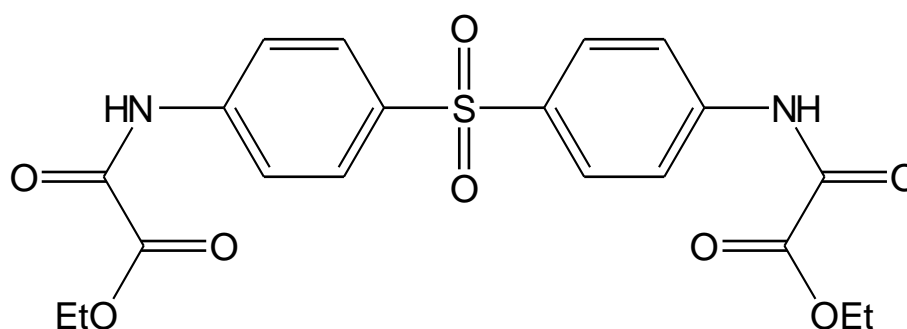

**Chart 1:** 4,4'-sulfonylbis(phenylamine)bis(ethyl-2-oxoacetate) ( $\text{H}_2\text{Et}_2\text{L}$ )

3- Crystallographic data

**Table S2** : Hydrogen bonds parameters of **H<sub>4</sub>L**:

| <b>D-H...A</b>             | <b>D-H (Å)</b> | <b>H...A (Å)</b> | <b>D...A (Å)</b> | <b>D-H...A (°)</b> |
|----------------------------|----------------|------------------|------------------|--------------------|
| O4-H4...OW1                | 0.820          | 1.865            | 2.623            | 153.08             |
| O1W-H7...O2 <sup>i</sup>   | 0.833          | 2.059            | 2.862            | 161.78             |
| O1W-H8...O2W <sup>ii</sup> | 0.833          | 1.806            | 2.638            | 175.38             |
| N1-H1...O5 <sup>iii</sup>  | 0.860          | 2.153            | 2.934            | 150.90             |

Symmetry codes: i = -0.5-x, 1-y, 0.5+z; ii = -0.5+x, y, 0.5-z; iii = -x, 1-y, 1-z.

**Table S3:** Selected bond lengths (Å) and bond angles (°) for [Ca(H<sub>2</sub>L)(H<sub>2</sub>O)].2H<sub>2</sub>O.

| Bond length                             |            |                                         |            |
|-----------------------------------------|------------|-----------------------------------------|------------|
| Ca <sup>i</sup> -O5                     | 2.440(5)   | Ca-O1W                                  | 2.429(5)   |
| Ca <sup>ii</sup> -O5                    | 2.458(5)   | Ca <sup>iv</sup> -O1                    | 2.470(5)   |
| Ca <sup>ii</sup> -O4                    | 2.561(5)   | Ca-O1                                   | 2.500(5)   |
| Ca <sup>iii</sup> -O6                   | 2.403(6)   | Ca <sup>iv</sup> -O3                    | 2.515(5)   |
| Bond angles                             |            |                                         |            |
| O6 <sup>iii</sup> -Ca-O1W               | 82.23(19)  | O1W-Ca <sup>i</sup> -O5                 | 102.70(19) |
| O1W-Ca <sup>ii</sup> -O5                | 77.35(18)  | O6 <sup>iii</sup> -Ca <sup>iv</sup> -O1 | 75.75(18)  |
| O5 <sup>i</sup> -Ca <sup>iv</sup> -O1   | 80.82(18)  | O6 <sup>iii</sup> -Ca-O1                | 72.24(19)  |
| O5 <sup>i</sup> -Ca-O1                  | 70.74(17)  | O1 <sup>iv</sup> -Ca-O1                 | 77.95(18)  |
| O1W-Ca <sup>iv</sup> -O3                | 145.43(19) | O5 <sup>ii</sup> -Ca <sup>iv</sup> -O3  | 74.34(17)  |
| O1-Ca <sup>iv</sup> -O3                 | 139.43(18) | O1W-Ca <sup>ii</sup> -O4                | 78.82(18)  |
| O5 <sup>i</sup> -Ca <sup>ii</sup> -O4   | 66.18(17)  | O1-Ca <sup>ii</sup> -O4                 | 146.82(18) |
| O6 <sup>iii</sup> -Ca <sup>i</sup> -O5  | 139.42(18) | O6 <sup>iii</sup> -Ca <sup>ii</sup> -O5 | 147.93(18) |
| O5 <sup>i</sup> -Ca <sup>i</sup> -O5    | 70.05(19)  | O1W-Ca <sup>iv</sup> -O1                | 148.38(18) |
| O5 <sup>ii</sup> -Ca <sup>iv</sup> -O1  | 131.61(18) | O1W-Ca-O1                               | 73.85(17)  |
| O5 <sup>ii</sup> -Ca-O1                 | 123.80(18) | O6 <sup>iii</sup> -Ca <sup>iv</sup> -O3 | 112.87(19) |
| O5 <sup>i</sup> -Ca <sup>iv</sup> -O3   | 85.91(18)  | O1 <sup>iv</sup> -Ca <sup>iv</sup> -O3  | 65.60(17)  |
| O6 <sup>iii</sup> -Ca <sup>ii</sup> -O4 | 85.87(19)  | O5 <sup>i</sup> -Ca <sup>ii</sup> -O4   | 134.71(17) |
| O1 <sup>iv</sup> -Ca <sup>ii</sup> -O4  | 121.16(18) | O3 <sup>iv</sup> -Ca <sup>ii</sup> -O4  | 71.88(18)  |

Symmetry codes: i = 0.5+x, 0.5+y, 1+z; ii = -0.5-x, 0.5+y, 0.5-z; iii = -0.5-x, 1.5-y, -z; iv = -x, 2-y, 1-z.

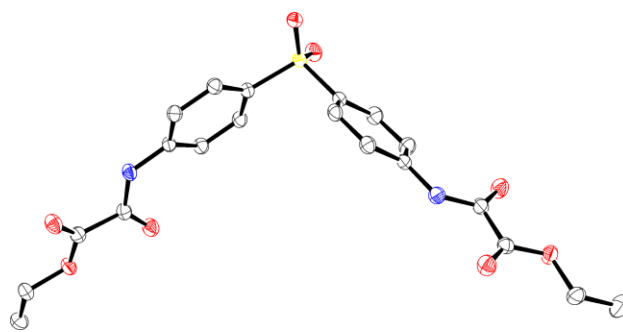

(a)

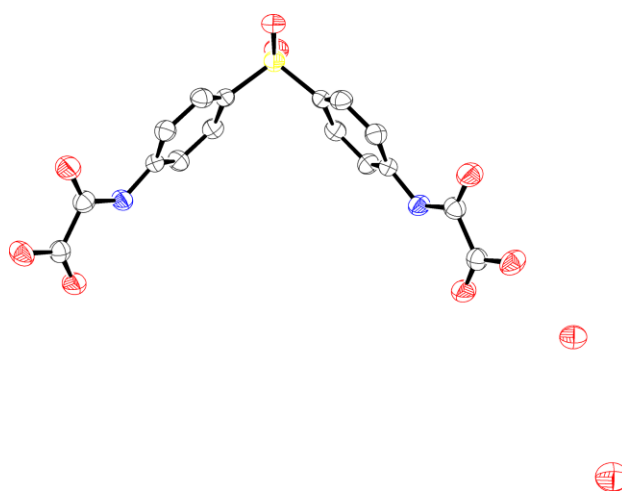

(b)

**Figure S1:** Perspective views for  $\text{H}_2\text{Et}_2\text{L}$  (a) and  $\text{H}_4\text{L}$  (b). Color code: grey, red, blue, yellow stand for carbon, oxygen, nitrogen and sulfur, respectively.

4-           References

- 
- 1- R. A. A. Cassaro, S. Ciattini, S. Soriano, H. S. Amorim, N. L. Speziali, M. Andruh and M. G. F. Vaz, *Cryst. Growth Des.* 2013, **13**, 2711-2715.
  - 2- H. K. Henisch, *Crystal Growth in Gels*, The Pennsylvania State, Univ. Press, Pittsburgh 1970; R-Q. Song and H. Golfen, *CrystEngCommun* 2011, **13**, 1249-1276.
  - 3- CRYALISPRO, v. 1.171.33.41, Oxford Diffraction Ltd., release 06-05-2009 CrysAlis171; CRYALISPRO, v. 1.171.33.36, Oxford Diffraction Ltd., release 16-03-2009 CrysAlis171.
  - 4- SCALE3 ABSPACK scaling algorithm. CrysAlis RED, Oxford Diffraction Ltd.
  - 5- Z. Otwinowski and W. Minor, In *Methods in Enzymology: Macromolecular Crystallography, Part A*, C. W. Carter Jr., R. M. Sweet, Eds. Volume 276, Academic Press, New York, NY, 1997; p. 307-326.
  - 6- G. M. Sheldrick, *Acta Cryst.* 2008, **A64**, 112-122.
